# Supplementary material
Source: PubMed Central journal article supplement (PMC3421123)
Supplement: ejhg201238x1.pdf [file ejhg201238x1.pdf]

## The Schizophrenia Psychiatric GWAS Consortium author list:

Stephan Ripke<sup>1</sup>, Alan R. Sanders<sup>2,3</sup>, Kenneth S. Kendler<sup>4,5,6</sup>, Douglas F. Levinson<sup>7</sup>, Pamela Sklar<sup>1,8</sup>, Peter A. Holmans<sup>9,10</sup>, Dan-Yu Lin<sup>11</sup>, Jubao Duan<sup>2,3</sup>, Roel A. Ophoff<sup>12,13,14,15</sup>, Ole A. Andreassen<sup>16,17</sup>, Edward Scolnick<sup>18</sup>, Sven Cichon<sup>19,20,21</sup>, David St. Clair<sup>22</sup>, Aiden Corvin<sup>23</sup>, Hugh Gurling<sup>24</sup>, Thomas Werge<sup>25</sup>, Dan Rujescu<sup>26</sup>, Douglas H. R. Blackwood<sup>27</sup>, Carlos N. Pato<sup>28</sup>, Anil K. Malhotra<sup>29,30,31</sup>, Shaun Purcell<sup>18</sup>, Frank Dudbridge<sup>32</sup>, Benjamin M. Neale<sup>18</sup>, Lizzy Rossin<sup>1</sup>, Peter M. Visscher<sup>33</sup>, Danielle Posthuma<sup>34,35</sup>, Douglas M. Ruderfer<sup>1</sup>, Ayman Fanous<sup>36,37,38</sup>, Hreinn Stefansson<sup>39</sup>, Stacy Steinberg<sup>39</sup>, Bryan J. Mowry<sup>40,41</sup>, Vera Golimbet<sup>42</sup>, Marc De Hert<sup>43</sup>, Erik G. Jönsson<sup>44</sup>, István Bitter<sup>45</sup>, Olli P. H. Pietiläinen<sup>46,47</sup>, David A. Collier<sup>48</sup>, Sarah Tosato<sup>49</sup>, Ingrid Agartz<sup>16,50</sup>, Margot Albus<sup>51</sup>, Madeline Alexander<sup>7</sup>, Richard L. Amdur<sup>36,37</sup>, Farooq Amin<sup>52,53</sup>, Nicholas Bass<sup>24</sup>, Sarah E. Bergen<sup>1</sup>, Donald W. Black<sup>54</sup>, Anders D. Børghlum<sup>55,56</sup>, Matthew A. Brown<sup>57</sup>, Richard Bruggeman<sup>58</sup>, Nancy G. Buccola<sup>59</sup>, William F. Byerley<sup>60,61</sup>, Wiepke Cahn<sup>62</sup>, Rita M. Cantor<sup>14,15</sup>, Vaughan J. Carr<sup>63</sup>, Stanley V. Catts<sup>64</sup>, Khalid Choudhury<sup>24</sup>, C. Robert Cloninger<sup>65</sup>, Paul Cormican<sup>23</sup>, Nicholas Craddock<sup>9,10</sup>, Patrick A. Danoy<sup>57</sup>, Susmita Datta<sup>24</sup>, Lieuwe de Haan<sup>66</sup>, Ditte Demontis<sup>55</sup>, Dimitris Dikeos<sup>67</sup>, Srdjan Djurovic<sup>16,68</sup>, Peter Donnelly<sup>69,70</sup>, Gary Donohoe<sup>23</sup>, Linh Duong<sup>25</sup>, Sarah Dwyer<sup>9,10</sup>, Anders Fink-Jensen<sup>71</sup>, Robert Freedman<sup>72</sup>, Nelson B. Freimer<sup>14</sup>, Marion Friedl<sup>26</sup>, Lyudmila Georgieva<sup>9,10</sup>, Ina Giegling<sup>26</sup>, Michael Gill<sup>23</sup>, Birte Glenthøj<sup>73</sup>, Stephanie Godard<sup>74</sup>, Marian Hamshere<sup>9,10</sup>, Mark Hansen<sup>75</sup>, Thomas Hansen<sup>25</sup>, Annette M. Hartmann<sup>26</sup>, Frans A. Henskens<sup>76</sup>, David M Hougaard<sup>77</sup>, Christina M. Hultman<sup>78</sup>, Andrés Ingason<sup>25</sup>, Assen V. Jablensky<sup>79</sup>, Klaus D. Jakobsen<sup>25</sup>, Maurice Jay<sup>80</sup>, Gesche Jürgens<sup>81</sup>, René S. Kahn<sup>62</sup>, Matthew C. Keller<sup>82</sup>, Gunter Kenis<sup>83</sup>, Elaine Kenny<sup>23</sup>, Yunjung Kim<sup>84</sup>, George K. Kirov<sup>9,10</sup>, Heike Konnerth<sup>26</sup>, Bettina Konte<sup>26</sup>, Lydia Krabbendam<sup>85</sup>, Robert Krasucki<sup>24</sup>, Virginia K. Lasseter<sup>86</sup>, Claudine Laurent<sup>80</sup>, Jacob Lawrence<sup>24</sup>, Todd Lencz<sup>29,30,31</sup>, F. Bernard Lerer<sup>87</sup>, Kung-Yee Liang<sup>88</sup>, Paul Lichtenstein<sup>78</sup>, Jeffrey A. Lieberman<sup>89</sup>, Don H. Linszen<sup>66</sup>, Jouko Lönnqvist<sup>90</sup>, Carmel M. Loughland<sup>91</sup>, Alan W. Maclean<sup>27</sup>, Brien S. Maher<sup>4,5,6</sup>, Wolfgang Maier<sup>92</sup>, Jacques Mallet<sup>93</sup>, Pat Malloy<sup>27</sup>, Manuel Mattheisen<sup>19,21,94</sup>, Morten Mattingsdal<sup>16,95</sup>, Kevin A. McGhee<sup>27</sup>, John J. McGrath<sup>40,41</sup>, Andrew McIntosh<sup>27</sup>, Duncan E. McLean<sup>96</sup>, Andrew McQuillin<sup>24</sup>, Ingrid Melle<sup>16,17</sup>, Patricia T. Michie<sup>97,98</sup>, Vihra Milanova<sup>99</sup>, Derek W. Morris<sup>23</sup>, Ole Mors<sup>56</sup>, Preben B. Mortensen<sup>100</sup>, Valentina Moskvina<sup>9,10</sup>, Pierandrea Muglia<sup>101,102</sup>, Inez Myin-Germeys<sup>85</sup>, Deborah A. Nertney<sup>40,41</sup>, Gerald Nestadt<sup>86</sup>, Jimmi Nielsen<sup>103</sup>, Ivan Nikolov<sup>9,10</sup>, Merete Nordentoft<sup>104</sup>, Nadine Norton<sup>9,10</sup>, Markus M. Nöthen<sup>19,21</sup>, Colm T. O'Dushlaine<sup>23</sup>, Ann Olincy<sup>72</sup>, Line Olsen<sup>25</sup>, F. Anthony O'Neill<sup>105</sup>, Torben F. Ørntoft<sup>106,107</sup>, Michael J. Owen<sup>9,10</sup>, Christos Pantelis<sup>108</sup>, George Papadimitriou<sup>67</sup>, Michele T. Pato<sup>28</sup>, Leena Peltonen<sup>46,47,109</sup>, Hannes Petursson<sup>110</sup>, Ben Pickard<sup>111</sup>, Jonathan Pimm<sup>24</sup>, Ann E. Pulver<sup>86</sup>, Vinay Puri<sup>24</sup>, Digby Quested<sup>112</sup>, Emma M. Quinn<sup>23</sup>, Henrik B. Rasmussen<sup>25</sup>, János M. Réthelyi<sup>45</sup>, Robert Ribble<sup>4,5,6</sup>, Marcella Rietschel<sup>92,113</sup>, Brien P. Riley<sup>4,5,6</sup>, Mirella Ruggeri<sup>49</sup>, Ulrich Schall<sup>98,114</sup>, Thomas G. Schulze<sup>113,115</sup>, Sibylle G. Schwab<sup>116,117,118</sup>, Rodney J. Scott<sup>119</sup>, Jianxin Shi<sup>120</sup>, Engilbert Sigurdsson<sup>110,121</sup>, Jeremy M. Silverman<sup>8,122</sup>, Chris C. A. Spencer<sup>69</sup>, Kari Stefansson<sup>39</sup>, Amy Strange<sup>69</sup>, Eric Strengman<sup>12,13</sup>, T. Scott Stroup<sup>89</sup>, Jaana Suvisaari<sup>90</sup>, Lars Terenius<sup>44</sup>, Srinivasa Thirumalai<sup>123</sup>, Johan H. Thygesen<sup>25</sup>, Sally Timm<sup>124</sup>, Draga Toncheva<sup>125</sup>, Edwin van den Oord<sup>126</sup>, Jim van Os<sup>85</sup>, Ruud van Winkel<sup>43,83</sup>, Jan Veldink<sup>127</sup>, Dermot Walsh<sup>128</sup>, August G. Wang<sup>129</sup>, Durk Wiersma<sup>58</sup>, Dieter B. Wildenauer<sup>116,130</sup>, Hywel J. Williams<sup>9,10</sup>, Nigel M. Williams<sup>9,10</sup>, Brandon Wormley<sup>4,5,6</sup>, Stan Zammit<sup>9,10</sup>, Patrick F. Sullivan<sup>78,131,132,133</sup>, Michael C. O'Donovan<sup>9,10</sup>, Mark J. Daly<sup>1</sup>, Pablo V. Gejman<sup>2,3</sup>

## **The Schizophrenia Psychiatric GWAS Consortium author affiliations:**

<sup>1</sup>Center for Human Genetic Research, Massachusetts General Hospital, Boston, Massachusetts, USA. <sup>2</sup>Department of Psychiatry and Behavioral Sciences, NorthShore University HealthSystem, Evanston, Illinois, USA. <sup>3</sup>Department of Psychiatry and Behavioral Sciences, University of Chicago, Chicago, Illinois, USA. <sup>4</sup>Virginia Institute for Psychiatric and Behavioral Genetics, Virginia Commonwealth University School of Medicine, Richmond, Virginia, USA. <sup>5</sup>Department of Psychiatry, Virginia Commonwealth University School of Medicine, Richmond, Virginia, USA. <sup>6</sup>Department of Human and Molecular Genetics, Virginia Commonwealth University School of Medicine, Richmond, Virginia, USA. <sup>7</sup>Department of Psychiatry and Behavioral Sciences, Stanford University, Stanford, California, USA. <sup>8</sup>Department of Psychiatry, Mount Sinai School of Medicine, New York, USA. <sup>9</sup>MRC Centre for Neuropsychiatric Genetics and Genomics, School of Medicine, Cardiff University, Cardiff, Wales, UK. <sup>10</sup>Department of Psychological Medicine and Neurology, School of Medicine, Cardiff University, Cardiff, Wales, UK. <sup>11</sup>Department of Biostatistics, University of North Carolina, Chapel Hill, North Carolina, USA. <sup>12</sup>Department of Medical Genetics, University Medical Center Utrecht, Utrecht, The Netherlands. <sup>13</sup>Rudolf Magnus Institute of Neuroscience, University Medical Center Utrecht, Utrecht, The Netherlands. <sup>14</sup>UCLA Center for Neurobehavioral Genetics, University of California at Los Angeles, Los Angeles, California, USA. <sup>15</sup>Department of Human Genetics, University of California at Los Angeles, Los Angeles, California, USA. <sup>16</sup>Psychiatry Section, Institute of Clinical Medicine, University of Oslo, Oslo, Norway. <sup>17</sup>Department of Psychiatry, Oslo University Hospital, Oslo, Norway. <sup>18</sup>Broad Institute, Cambridge, Massachusetts, USA. <sup>19</sup>Department of Genomics, Life and Brain Center, University of Bonn, Bonn, Germany. <sup>20</sup>Institute of Neuroscience and Medicine (INM-1), Research Center Juelich, Juelich, Germany. <sup>21</sup>Institute of Human Genetics, University of Bonn, Bonn, Germany. <sup>22</sup>Institute of Medical Sciences, University of Aberdeen, Foresterhill, Aberdeen, Scotland, UK. <sup>23</sup>Neuropsychiatric Genetics Research Group, Trinity College Dublin, Dublin, Ireland. <sup>24</sup>Molecular Psychiatry Laboratory, Research Department of Mental Health Sciences, University College London Medical School, Windeyer Institute of Medical Sciences, London, England, UK. <sup>25</sup>Institute of Biological Psychiatry, MHC Sct. Hans, Copenhagen University Hospital, Roskilde, Denmark. <sup>26</sup>Molecular and Clinical Neurobiology, Department of Psychiatry, Ludwig-Maximilians-University, Munich, Germany. <sup>27</sup>Division of Psychiatry, University of Edinburgh, Royal Edinburgh Hospital, Edinburgh, Scotland, UK. <sup>28</sup>Keck School of Medicine, University of Southern California, Los Angeles, California, USA. <sup>29</sup>Department of Psychiatry, Division of Research, The Zucker Hillside Hospital Division of the North Shore - Long Island Jewish Health System, Glen Oaks, New York, USA. <sup>30</sup>Center for Psychiatric Neuroscience, The Feinstein Institute for Medical Research, Manhasset, New York, USA. <sup>31</sup>Department of Psychiatry and Behavioral Science, Albert Einstein College of Medicine of Yeshiva University, Bronx, New York, USA. <sup>32</sup>Department of Noncommunicable Disease Epidemiology, London School of Hygiene and Tropical Medicine, London, England, UK. <sup>33</sup>Queensland Statistical Genetics Laboratory, Queensland Institute of Medical Research, Brisbane, Queensland, Australia. <sup>34</sup>VU University, Center for Neurogenomics and Cognitive Research (CNCR), Department of Functional Genomics, Amsterdam, The Netherlands. <sup>35</sup>VU Medical Centre, Department of Medical Genomics, Amsterdam, The Netherlands. <sup>36</sup>Washington VA Medical Center, Washington, DC, USA. <sup>37</sup>Department of Psychiatry, Georgetown University School of Medicine, Washington, DC, USA. <sup>38</sup>Department of Psychiatry, Virginia Commonwealth University School of Medicine, Richmond, Virginia, USA. <sup>39</sup>deCODE genetics, Reykjavik, Iceland. <sup>40</sup>Queensland Brain Institute, University of Queensland;

Brisbane, Queensland, Australia. <sup>41</sup>Queensland Centre for Mental Health Research, University of Queensland; Brisbane, Queensland, Australia. <sup>42</sup>Mental Health Research Center, Russian Academy of Medical Sciences, Moscow, Russia. <sup>43</sup>University Psychiatric Centre, Catholic University Leuven, Kortenberg, Belgium. <sup>44</sup>Department of Clinical Neuroscience, HUBIN project, Karolinska Institutet and Hospital, Stockholm, Sweden. <sup>45</sup>Semmelweis University, Department of Psychiatry and Psychotherapy, Budapest, Hungary. <sup>46</sup>Institute for Molecular Medicine Finland FIMM, University of Helsinki, Helsinki, Finland. <sup>47</sup>Department of Medical Genetics, University of Helsinki, Helsinki, Finland. <sup>48</sup>Social, Genetic and Developmental Psychiatry Centre, Institute of Psychiatry, King's College, London, England, UK. <sup>49</sup>Section of Psychiatry and Clinical Psychology, University of Verona, Verona, Italy. <sup>50</sup>Department of Research, Diakonhjemmet Hospital, Oslo, Norway. <sup>51</sup>State Mental Hospital, Haar, Germany. <sup>52</sup>Department of Psychiatry and Behavioral Sciences, Emory University, Atlanta, Georgia, USA. <sup>53</sup>Department of Psychiatry and Behavioral Sciences, Atlanta Veterans Affairs Medical Center, Atlanta, Georgia, USA. <sup>54</sup>Department of Psychiatry, University of Iowa Carver College of Medicine, Iowa City, Iowa, USA. <sup>55</sup>Institute of Human Genetics, University of Aarhus, Aarhus, Denmark. <sup>56</sup>Centre for Psychiatric Research, Aarhus University Hospital, Risskov, Denmark. <sup>57</sup>University of Queensland Diamantina Institute, Princess Alexandra Hospital, University of Queensland, Brisbane, Queensland, Australia. <sup>58</sup>University Medical Center Groningen, Department of Psychiatry, University of Groningen, Groningen, The Netherlands. <sup>59</sup>School of Nursing, Louisiana State University Health Sciences Center, New Orleans, Louisiana, USA. <sup>60</sup>Department of Psychiatry, University of California at San Francisco, San Francisco, California, USA. <sup>61</sup>NCIRE (Northern California Institute for Research And Education), San Francisco, California, USA. <sup>62</sup>Department of Psychiatry, Rudolf Magnus Institute of Neuroscience, University Medical Center Utrecht, Utrecht, The Netherlands. <sup>63</sup>School of Psychiatry, University of New South Wales and Schizophrenia Research Institute, Sydney, New South Wales, Australia. <sup>64</sup>Department of Psychiatry, University of Queensland, Royal Brisbane Hospital, Brisbane, Australia. <sup>65</sup>Department of Psychiatry, Washington University, St. Louis, Missouri, USA. <sup>66</sup>Academic Medical Centre University of Amsterdam, Department of Psychiatry, Amsterdam, The Netherlands. <sup>67</sup>Department of Psychiatry, University of Athens Medical School, Athens, Greece. <sup>68</sup>Department of Medical Genetics, Oslo University Hospital, Oslo, Norway. <sup>69</sup>Wellcome Trust Centre for Human Genetics, Roosevelt Drive, Oxford, England, UK. <sup>70</sup>Department of Statistics, University of Oxford, Oxford, England, UK. <sup>71</sup>Mental Health Center Copenhagen, Copenhagen University Hospital, Copenhagen, Denmark. <sup>72</sup>Department of Psychiatry, University of Colorado Denver, Aurora, Colorado, USA. <sup>73</sup>Center for Clinical Intervention and Neuropsychiatric Schizophrenia Research, Mental Health Center Glostrup, Copenhagen University Hospital, Glostrup, Denmark. <sup>74</sup>INSERM, Institut de Myologie, Hôpital de la Pitié-Salpêtrière, Paris, France. <sup>75</sup>Illumina, Inc., La Jolla, California, USA. <sup>76</sup>School of Electrical Engineering & Computing Science, University of Newcastle, Newcastle, Australia. <sup>77</sup>Section of Neonatal Screening and Hormones, Department of Clinical Chemistry and Immunology, The State Serum Institute, Copenhagen, Denmark. <sup>78</sup>Department of Medical Epidemiology and Biostatistics, Karolinska Institutet, Stockholm, Sweden. <sup>79</sup>Centre for Clinical Research in Neuropsychiatry, School of Psychiatry and Clinical Neurosciences, The University of Western Australia, Perth, Australia. <sup>80</sup>Department of Child and Adolescent Psychiatry, Pierre and Marie Curie Faculty of Medicine, Paris, France. <sup>81</sup>Department of Clinical Pharmacology, Bispebjerg University Hospital, Copenhagen, Denmark. <sup>82</sup>Department of Psychology, University of Colorado, Boulder, Boulder, Colorado, USA. <sup>83</sup>Department of Psychiatry and Psychology, School of Mental Health and Neuroscience, European Graduate School of Neuroscience (EURON), South Limburg Mental Health Research and Teaching Network (SEARCH), Maastricht University Medical Centre,

Maastricht, the Netherlands. <sup>84</sup>Department of Genetics, University of North Carolina at Chapel Hill, Chapel Hill, North Carolina, USA. <sup>85</sup>Maastricht University Medical Centre, South Limburg Mental Health Research and Teaching Network, Maastricht, The Netherlands. <sup>86</sup>Department of Psychiatry and Behavioral Sciences, Johns Hopkins University School of Medicine, Baltimore, Maryland, USA. <sup>87</sup>Department of Psychiatry, Hadassah-Hebrew University Medical Center, Jerusalem, Israel. <sup>88</sup>Department of Biostatistics, Johns Hopkins University Bloomberg School of Public Health, Baltimore, Maryland, USA. <sup>89</sup>Department of Psychiatry, Columbia University, New York, New York, USA. <sup>90</sup>Departments of Mental Health and Substance Abuse Services, National Institute for Health and Welfare, Helsinki, Finland. <sup>91</sup>Schizophrenia Research Institute, Sydney and Centre for Brain and Mental Health Research, University of Newcastle, Newcastle, New South Wales, Australia. <sup>92</sup>Department of Psychiatry, University of Bonn, Bonn, Germany. <sup>93</sup>Laboratoire de Génétique Moléculaire de la Neurotransmission et des Processus Neurodégénératifs, Centre National de la Recherche Scientifique, Hôpital de la Pitié Salpêtrière, Paris, France. <sup>94</sup>Institute of Medical Biometry, Informatics and Epidemiology (IMBIE), University of Bonn, Bonn, Germany. <sup>95</sup>Department of Research, Sørlandet Hospital, Kristiansand, Norway. <sup>96</sup>Queensland Centre for Mental Health Research, The Park Centre for Mental Health, Wacol, Queensland, Australia. <sup>97</sup>Functional NeuroImaging Laboratory, School of Psychology, University of Newcastle, Sydney, New South Wales, Australia. <sup>98</sup>Schizophrenia Research Institute, Sydney, New South Wales, Australia. <sup>99</sup>Department of Psychiatry, First Psychiatric Clinic, Alexander University Hospital, Sofia, Bulgaria. <sup>100</sup>National Centre for Register-based Research, University of Aarhus, Aarhus, Denmark. <sup>101</sup>Department of Psychiatry, University of Toronto, Toronto, Canada. <sup>102</sup>NeuroSearch A/S, Ballerup, Denmark. <sup>103</sup>Unit for Psychiatric Research, Aalborg Psychiatric Hospital, Aalborg, Denmark. <sup>104</sup>Psychiatric Centre Copenhagen, Copenhagen University Hospital, Copenhagen, Denmark. <sup>105</sup>Department of Psychiatry, Queens University, Belfast, Ireland. <sup>106</sup>AROS Applied Biotechnology A/S, Skejby, Denmark. <sup>107</sup>Department of Molecular Medicine, Aarhus University Hospital, Skejby, Denmark. <sup>108</sup>Melbourne Neuropsychiatry Centre, Department of Psychiatry, The University of Melbourne & Melbourne Health, Melbourne, Australia. <sup>109</sup>Wellcome Trust Sanger Institute, Wellcome Trust Genome Campus, Hinxton, Cambridge, England, UK. <sup>110</sup>Department of Psychiatry, National University Hospital, Reykjavik, Iceland. <sup>111</sup>Strathclyde Institute of Pharmacy and Biomedical Sciences, The John Arbuthnott Building, University of Strathclyde, Glasgow, Scotland, UK. <sup>112</sup>Department of Psychiatry, University of Oxford, Warneford Hospital, Headington, Oxford, England, UK. <sup>113</sup>Department of Genetic Epidemiology in Psychiatry, Central Institute of Mental Health, University of Heidelberg, Mannheim, Germany. <sup>114</sup>Priority Centre for Brain & Mental Health Research, University of Newcastle, Sydney, New South Wales, Australia. <sup>115</sup>Department of Psychiatry & Psychotherapy, Georg-August-University, Göttingen, Germany. <sup>116</sup>School of Psychiatry and Clinical Neurosciences, University of Western Australia, Perth, Western Australia, Australia. <sup>117</sup>Department of Psychiatry, University of Erlangen-Nuremberg, Erlangen, Germany. <sup>118</sup>Centre for Medical Research, Western Australian Institute for Medical Research, University of Western Australia, Perth, Western Australia, Australia. <sup>119</sup>Centre for Information Based Medicine, University of Newcastle, Hunter Medical Research Institute, Newcastle and Schizophrenia Research Institute, Sydney, New South Wales, Australia. <sup>120</sup>Division of Cancer Epidemiology and Genetics, National Cancer Institute, Bethesda, Maryland, USA. <sup>121</sup>Department of Psychiatry, University of Iceland, Reykjavik, Iceland. <sup>122</sup>Department of Psychiatry, Veterans Affairs Medical Center, New York, New York, USA. <sup>123</sup>West Berkshire NHS Trust, Reading, England, UK. <sup>124</sup>Mental Health Center Frederiksberg, Copenhagen University Hospital, Copenhagen, Denmark. <sup>125</sup>Department of Medical Genetics, University Hospital Maichin Dom, Sofia, Bulgaria.

<sup>126</sup>Department of Pharmacy, Virginia Commonwealth University, Richmond, Virginia, USA. <sup>127</sup>Rudolf Magnus Institute of Neuroscience, Department of Neurology, UMC Utrecht, Utrecht, the Netherlands. <sup>128</sup>The Health Research Board, Dublin, Ireland. <sup>129</sup>Mental Health Center Amager, Copenhagen University Hospital, Copenhagen, Denmark. <sup>130</sup>Centre for Clinical Research in Neuropsychiatry, Graylands Hospital, Mt Claremont, Western Australia, Australia. <sup>131</sup>Department of Genetics, University of North Carolina at Chapel Hill, Chapel Hill, North Carolina, USA. <sup>132</sup>Department of Psychiatry, University of North Carolina at Chapel Hill, Chapel Hill, North Carolina, USA. <sup>133</sup>Department of Epidemiology, University of North Carolina at Chapel Hill, Chapel Hill, North Carolina, USA.
